# Supplementary material for: Antarctic Bedmap data: Findable, Accessible, Interoperable, and Reusable (FAIR) sharing of 60 years of ice bed, surface, and thickness data
Source: Copernicus journal article supplement (doi:10.5194/essd-15-2695-2023), 2023-07-17
Supplement: Supplementary file 1 [file essd-15-2695-2023-supplement.zip]

**Table S1.** List of survey data used to build Bedmap2. For each survey we provide the project name, institution, reference, source (DOI), firn correction, history, electromagnetic wave speed in ice, instrument used for acquisition and the centre frequency.

| filename                        | project                                                      | institution                                                    | reference                                                                                                       | source                                                                                                                                  | firn correction | history    | electromagnetic wave speed in ice | instrument | centre frequency |
|---------------------------------|--------------------------------------------------------------|----------------------------------------------------------------|-----------------------------------------------------------------------------------------------------------------|-----------------------------------------------------------------------------------------------------------------------------------------|-----------------|------------|-----------------------------------|------------|------------------|
| AWI_1994_DML1_AIR_BM2           | Dronning Maud Land                                           | Alfred Wegener Institute                                       | <a href="https://doi.org/10.3189/172756499781820996">https://doi.org/10.3189/172756499781820996</a>             | <a href="https://doi.org/10.1594/PANGAEA.957053">https://doi.org/10.1594/PANGAEA.957053</a>                                             | 0               | Incoherent | 168.1                             | AWI EMR    | 150              |
| AWI_1995_DML2_AIR_BM2           | Dronning Maud Land                                           | Alfred Wegener Institute                                       | <a href="https://hdl.handle.net/10013/epic.15056">https://hdl.handle.net/10013/epic.15056</a>                   | <a href="https://doi.org/10.1594/PANGAEA.957054">https://doi.org/10.1594/PANGAEA.957054</a>                                             | 0               | Incoherent | 168.1                             | AWI EMR    | 150              |
| AWI_1996_DML3_AIR_BM2           | Dronning Maud Land                                           | Alfred Wegener Institute                                       | <a href="https://hdl.handle.net/10013/epic.15056">https://hdl.handle.net/10013/epic.15056</a>                   | <a href="https://doi.org/10.1594/PANGAEA.957056">https://doi.org/10.1594/PANGAEA.957056</a>                                             | 0               | Incoherent | 168.1                             | AWI EMR    | 150              |
| AWI_1997_DML4_AIR_BM2           | Dronning Maud Land                                           | Alfred Wegener Institute                                       | <a href="https://hdl.handle.net/10013/epic.15056">https://hdl.handle.net/10013/epic.15056</a>                   | <a href="https://doi.org/10.1594/PANGAEA.957058">https://doi.org/10.1594/PANGAEA.957058</a>                                             | 0               | Incoherent | 168.1                             | AWI EMR    | 150              |
| AWI_1998_DML5_AIR_BM2           | Dronning Maud Land                                           | Alfred Wegener Institute                                       | <a href="https://hdl.handle.net/10013/epic.15056">https://hdl.handle.net/10013/epic.15056</a>                   | <a href="https://doi.org/10.1594/PANGAEA.957059">https://doi.org/10.1594/PANGAEA.957059</a>                                             | 0               | Incoherent | 168.1                             | AWI EMR    | 150              |
| AWI_2000_DML6_AIR_BM2           | Dronning Maud Land                                           | Alfred Wegener Institute                                       | <a href="https://doi.org/10.1111/j.1365-246X.2012.05363.x">https://doi.org/10.1111/j.1365-246X.2012.05363.x</a> | <a href="https://doi.org/10.1594/PANGAEA.957061">https://doi.org/10.1594/PANGAEA.957061</a>                                             | 0               | Incoherent | 168.1                             | AWI EMR    | 150              |
| AWI_2001_DML7_AIR_BM2           | Dronning Maud Land                                           | Alfred Wegener Institute                                       | <a href="https://doi.org/10.1111/j.1365-246X.2012.05363.x">https://doi.org/10.1111/j.1365-246X.2012.05363.x</a> | <a href="https://doi.org/10.1594/PANGAEA.957063">https://doi.org/10.1594/PANGAEA.957063</a>                                             | 0               | Incoherent | 168.1                             | AWI EMR    | 150              |
| AWI_2002_DML8_AIR_BM2           | Dronning Maud Land                                           | Alfred Wegener Institute                                       | <a href="https://doi.org/10.1111/j.1365-246X.2012.05363.x">https://doi.org/10.1111/j.1365-246X.2012.05363.x</a> | <a href="https://doi.org/10.1594/PANGAEA.957062">https://doi.org/10.1594/PANGAEA.957062</a>                                             | 0               | Incoherent | 168.1                             | AWI EMR    | 150              |
| AWI_2003_DML9_AIR_BM2           | Dronning Maud Land                                           | Alfred Wegener Institute                                       | <a href="https://doi.org/10.1111/j.1365-246X.2012.05363.x">https://doi.org/10.1111/j.1365-246X.2012.05363.x</a> | <a href="https://doi.org/10.1594/PANGAEA.957064">https://doi.org/10.1594/PANGAEA.957064</a>                                             | 0               | Incoherent | 168.1                             | AWI EMR    | 150              |
| AWI_2004_DML10_AIR_BM2          | Dronning Maud Land                                           | Alfred Wegener Institute                                       | <a href="https://doi.org/10.1111/j.1365-246X.2012.05363.x">https://doi.org/10.1111/j.1365-246X.2012.05363.x</a> | <a href="https://doi.org/10.1594/PANGAEA.957060">https://doi.org/10.1594/PANGAEA.957060</a>                                             | 0               | Incoherent | 168.1                             | AWI EMR    | 150              |
| AWI_2005_ANTSYSO_AIR_BM2        | Shirase Glacier; Syowa Station; Dronning Maud Land (ANTSYSO) | Alfred Wegener Institute; National Institute of Polar Research | <a href="https://doi.org/10.1016/j.precamres.2013.02.008">https://doi.org/10.1016/j.precamres.2013.02.008</a>   | <a href="https://doi.org/10.1594/PANGAEA.957065">https://doi.org/10.1594/PANGAEA.957065</a>                                             | 0               | Incoherent | 168.1                             | AWI EMR    | 150              |
| AWI_2007_ANTR_AIR_BM2           | Dronning Maud Land; Princess Elizabeth Land; Dome A; Dome C  | Alfred Wegener Institute                                       | <a href="https://doi.org/10.5194/essd-11-1069-2019">https://doi.org/10.5194/essd-11-1069-2019</a>               | <a href="https://doi.org/10.1594/PANGAEA.957066">https://doi.org/10.1594/PANGAEA.957066</a>                                             | 0               | Incoherent | 168.1                             | AWI EMR    | 150              |
| BAS_1994_Evans_AIR_BM2          | Evans Ice Stream                                             | British Antarctic Survey                                       | <a href="https://doi.org/10.1016/S0040-1951(01)00236-0">https://doi.org/10.1016/S0040-1951(01)00236-0</a>       | <a href="https://doi.org/10.5285/2C261013-9A0E-447D-A5BB-B506610B14FF">https://doi.org/10.5285/2C261013-9A0E-447D-A5BB-B506610B14FF</a> | 10              | Incoherent | 168                               | BAS-built  | 150              |
| BAS_1998_Dufek_AIR_BM2          | Dufek Massif                                                 | British Antarctic Survey                                       | <a href="https://doi.org/10.1016/S0012-821X(97)00165-9">https://doi.org/10.1016/S0012-821X(97)00165-9</a>       | <a href="https://doi.org/10.5285/5E2CF315-9265-4605-8643-382F2557009B">https://doi.org/10.5285/5E2CF315-9265-4605-8643-382F2557009B</a> | 10              | Incoherent | 168                               | BAS-built  | 150              |
| BAS_2001_Bailey-Slessor_AIR_BM2 | Bailey Ice Stream; Slessor Glacier                           | British Antarctic Survey                                       | <a href="https://doi.org/10.1029/2003JF000039">https://doi.org/10.1029/2003JF000039</a>                         | <a href="https://doi.org/10.5285/C5175014-A056-4799-A8C0-65B5FC433743">https://doi.org/10.5285/C5175014-A056-4799-A8C0-65B5FC433743</a> | 10              | Incoherent | 168                               | BAS-built  | 150              |

|                                          |                                                     |                                                   |                                                                                                                 |                                                                                                                                         |       |                                     |       |                              |     |
|------------------------------------------|-----------------------------------------------------|---------------------------------------------------|-----------------------------------------------------------------------------------------------------------------|-----------------------------------------------------------------------------------------------------------------------------------------|-------|-------------------------------------|-------|------------------------------|-----|
| BAS_2001_MAMOG_AIR_BM2                   | Jutulstraumen Ice Stream (MAMOG)                    | British Antarctic Survey                          | <a href="https://doi.org/10.1111/j.1365-3121.2005.00651.x">https://doi.org/10.1111/j.1365-3121.2005.00651.x</a> | <a href="https://doi.org/10.5285/84A273D9-8191-4316-B8F6-DC907EB0947A">https://doi.org/10.5285/84A273D9-8191-4316-B8F6-DC907EB0947A</a> | 10    | Incoherent                          | 168   | BAS-built                    | 150 |
| BAS_2001_TORUS_AIR_BM2                   | Rutford Ice Stream (TORUS)                          | British Antarctic Survey                          | <a href="https://doi.org/10.5194/essd-14-3379-2022">https://doi.org/10.5194/essd-14-3379-2022</a>               | <a href="https://doi.org/10.5285/4B2CCDA1-91EC-4C57-9AE0-07B9A387F352">https://doi.org/10.5285/4B2CCDA1-91EC-4C57-9AE0-07B9A387F352</a> | 10    | Incoherent                          | 168   | BAS-built                    | 150 |
| BAS_2004_BBAS_AIR_BM2                    | Pine Island Glacier (BBAS)                          | British Antarctic Survey                          | <a href="https://doi.org/10.1029/2005GL025588">https://doi.org/10.1029/2005GL025588</a>                         | <a href="https://doi.org/10.5285/3ADB739A-9EDA-434D-9883-03AB092CABAE">https://doi.org/10.5285/3ADB739A-9EDA-434D-9883-03AB092CABAE</a> | 10    | Incoherent                          | 168   | PASIN                        | 150 |
| BAS_2005_WISE-ISODYN_AIR_BM2             | Wilkes Subglacial Basin (WISE-ISODYN)               | British Antarctic Survey                          | <a href="https://doi.org/10.5194/essd-14-3379-2022">https://doi.org/10.5194/essd-14-3379-2022</a>               | <a href="https://doi.org/10.5285/59e5a6f5-e67d-4a05-99af-30f656569401">https://doi.org/10.5285/59e5a6f5-e67d-4a05-99af-30f656569401</a> | 10    | 2D Synthetic Aperture Radar         | 168   | PASIN                        | 150 |
| BAS_2006_GRADES-IMAGE_AIR_BM2            | Evans Ice Stream; Rutford Ice Stream (GRADES-IMAGE) | British Antarctic Survey                          | <a href="https://doi.org/10.3189/2014AoG67A052">https://doi.org/10.3189/2014AoG67A052</a>                       | <a href="https://doi.org/10.5285/4EFA688E-7659-4CBF-A72F-FACAC5D63998">https://doi.org/10.5285/4EFA688E-7659-4CBF-A72F-FACAC5D63998</a> | 10    | 2D Synthetic Aperture Radar         | 168   | PASIN                        | 150 |
| BAS_2007_AGAP_AIR_BM2                    | Gamburtsev Subglacial Mountains; Dome A (AGAP)      | British Antarctic Survey                          | <a href="https://doi.org/10.1038/nature10566">https://doi.org/10.1038/nature10566</a>                           | <a href="https://doi.org/10.5285/0f6f5a45-d8af-4511-a264-b0b35ee34af6">https://doi.org/10.5285/0f6f5a45-d8af-4511-a264-b0b35ee34af6</a> | 10    | 2D Synthetic Aperture Radar         | 168   | PASIN                        | 150 |
| BAS_2007_TIGRIS_GRN_BM2                  | Pine Island Glacier (TIGRIS)                        | British Antarctic Survey; University of Edinburgh | <a href="https://doi.org/10.1038/s41467-017-01597-y">https://doi.org/10.1038/s41467-017-01597-y</a>             | -9999                                                                                                                                   | 10    | 2-D migration                       | 168   | DELORES                      | 2   |
| BAS_2009_Ferrigno_GRN_BM2                | Ferrigno Ice Stream                                 | British Antarctic Survey; University of Edinburgh | <a href="https://doi.org/10.1038/nature11292">https://doi.org/10.1038/nature11292</a>                           | -9999                                                                                                                                   | 10    | 2-D migration                       | 168.5 | DELORES                      | 2   |
| BAS_2010_IMAFI_AIR_BM2                   | Institute-Möller Ice Stream (IMAFI)                 | British Antarctic Survey                          | <a href="https://doi.org/10.1038/NGEO1468">https://doi.org/10.1038/NGEO1468</a>                                 | <a href="https://doi.org/10.5285/7946C497-72FC-41CB-A9B2-BF9980EFE156">https://doi.org/10.5285/7946C497-72FC-41CB-A9B2-BF9980EFE156</a> | 10    | 2D Synthetic Aperture Radar         | 168   | PASIN                        | 150 |
| BAS_2010_PIG_AIR_BM2                     | Pine Island Glacier Ice Shelf                       | British Antarctic Survey                          | <a href="https://doi.org/10.1029/2012JF002360">https://doi.org/10.1029/2012JF002360</a>                         | <a href="https://doi.org/10.5285/E88F651C-3389-4D99-8333-07872DCEAB57">https://doi.org/10.5285/E88F651C-3389-4D99-8333-07872DCEAB57</a> | 10    | 2D Synthetic Aperture Radar         | 168   | PASIN                        | 150 |
| BGR_1999_GANOVEX-VIII-Mertz_AIR_BM2      | Mertz Glacier (GANOVEX VIII)                        | Bundesanstalt für Geowissenschaften und Rohstoffe | -9999                                                                                                           | -9999                                                                                                                                   | 0     | Linear/logarithmic signal detection | 168   | BGR-TUHH helicopter-borne    | 150 |
| BGR_1999_GANOVEX-VIII-Matusevich_AIR_BM2 | Matusevich Glacier (GANOVEX VIII)                   | Bundesanstalt für Geowissenschaften und Rohstoffe | -9999                                                                                                           | -9999                                                                                                                                   | 0     | Linear/logarithmic signal detection | 168   | BGR-TUHH helicopter-borne    | 150 |
| BGR_2002_PCMEGA_AIR_BM2                  | Lambert Glacier; Prince Charles Mountains (PCMEGA)  | Bundesanstalt für Geowissenschaften und Rohstoffe | <a href="https://doi.org/10.1007/s00190-007-0189-2">https://doi.org/10.1007/s00190-007-0189-2</a>               | -9999                                                                                                                                   | 0     | Logarithmic signal detection        | 168   | BGR-TUHH fixed-wing aircraft | 150 |
| INGV_1997_ITASE_AIR_BM2                  | Talos Dome; Oats Land (ITASE)                       | Istituto Nazionale di Geofisica e Vulcanologia    | <a href="https://doi.org/10.3189/172756404781814591">https://doi.org/10.3189/172756404781814591</a>             | -9999                                                                                                                                   | -9999 | -9999                               | 168   | INGV-IT GlacioRadar          | 60  |
| LDEO_2007_Recovery-Lakes_AIR_BM2         | Recovery Lakes                                      | Lamont-Doherty Earth Observatory                  | -9999                                                                                                           | -9999                                                                                                                                   | -9999 | 1-D Synthetic Aperture Radar        | -9999 | LDEO radar                   | 150 |

|                               |                                                |                                                                                                                        |                                                                                                     |                                                                                             |       |                                      |       |                                |         |
|-------------------------------|------------------------------------------------|------------------------------------------------------------------------------------------------------------------------|-----------------------------------------------------------------------------------------------------|---------------------------------------------------------------------------------------------|-------|--------------------------------------|-------|--------------------------------|---------|
| LDEO_2007_AGAP-GAMBIT_AIR_BM2 | Gamburtsev Subglacial Mountains; Dome A (AGAP) | Lamont-Doherty Earth Observatory                                                                                       | <a href="https://doi.org/10.1126/science.1200109">https://doi.org/10.1126/science.1200109</a>       | <a href="https://doi.org/10.1594/IEDA/317765">https://doi.org/10.1594/IEDA/317765</a>       | -9999 | 1-D Synthetic Aperture Radar         | -9999 | LDEO radar                     | 150     |
| NASA_2002_ICEBRIDGE_AIR_BM2   | NASA Operation IceBridge                       | Center for Remote Sensing of Ice Sheets; National Aeronautics and Space Administration; Centro de Estudios Científicos | <a href="https://doi.org/10.3189/172756404781813916">https://doi.org/10.3189/172756404781813916</a> | <a href="https://data.cresis.ku.edu/">https://data.cresis.ku.edu/</a>                       | 0     | 2-D Synthetic Aperture Radar focused | 169   | ICORDS2                        | 150     |
| NASA_2004_ICEBRIDGE_AIR_BM2   | NASA Operation IceBridge                       | Center for Remote Sensing of Ice Sheets                                                                                | -9999                                                                                               | <a href="https://data.cresis.ku.edu/">https://data.cresis.ku.edu/</a>                       | 0     | 2-D Synthetic Aperture Radar focused | 169   | ACORDS                         | 150     |
| NASA_2009_ICEBRIDGE_AIR_BM2   | NASA Operation IceBridge                       | Center for Remote Sensing of Ice Sheets                                                                                | <a href="https://doi.org/10.1029/2020RG000712">https://doi.org/10.1029/2020RG000712</a>             | <a href="https://data.cresis.ku.edu/">https://data.cresis.ku.edu/</a>                       | 0     | 2-D Synthetic Aperture Radar focused | 169   | MCoRDS                         | 189-201 |
| NASA_2010_ICEBRIDGE_AIR_BM2   | NASA Operation IceBridge                       | Center for Remote Sensing of Ice Sheets                                                                                | <a href="https://doi.org/10.1029/2020RG000712">https://doi.org/10.1029/2020RG000712</a>             | <a href="https://data.cresis.ku.edu/">https://data.cresis.ku.edu/</a>                       | 0     | 2-D Synthetic Aperture Radar focused | 169   | MCoRDS                         | 189-199 |
| NASA_2011_ICEBRIDGE_AIR_BM2   | NASA Operation IceBridge                       | Center for Remote Sensing of Ice Sheets                                                                                | <a href="https://doi.org/10.1029/2020RG000712">https://doi.org/10.1029/2020RG000712</a>             | <a href="https://data.cresis.ku.edu/">https://data.cresis.ku.edu/</a>                       | 0     | 2-D Synthetic Aperture Radar focused | 169   | MCoRDS                         | 189-200 |
| NASA_2012_ICEBRIDGE_AIR_BM2   | NASA Operation IceBridge                       | Center for Remote Sensing of Ice Sheets                                                                                | <a href="https://doi.org/10.1029/2020RG000712">https://doi.org/10.1029/2020RG000712</a>             | <a href="https://data.cresis.ku.edu/">https://data.cresis.ku.edu/</a>                       | 0     | 2-D Synthetic Aperture Radar focused | 169   | MCoRDS                         | 189-200 |
| NIPR_1999_JARE40_GRN_BM2      | Dome Fuji (JARE40)                             | Japanese Antarctic Research Expedition; National Institute of Polar Research                                           | -9999                                                                                               | -9999                                                                                       | -9999 | Incoherent                           | 168.7 | VHF179                         | 179     |
| NIPR_2007_JASE_GRN_BM2        | Dome Fuji (JASE)                               | Japanese Antarctic Research Expedition; National Institute of Polar Research                                           | -9999                                                                                               | -9999                                                                                       | -9999 | Incoherent                           | 168.7 | VHF179                         | 179     |
| NIPR_2007_JARE49_GRN_BM2      | Dome Fuji (JARE-49)                            | Japanese Antarctic Research Expedition; National Institute of Polar Research                                           | -9999                                                                                               | -9999                                                                                       | -9999 | Coherent; Incoherent                 | 168.7 | POL179                         | 179     |
| NPI_2008_BELISSIMA_GRN_BM2    | Roi Baudoin Ice Shelf Ice Rise                 | Norwegian Polar Institute                                                                                              | <a href="https://doi.org/10.3189/2012AoG60A106">https://doi.org/10.3189/2012AoG60A106</a>           | -9999                                                                                       | 0     | Incoherent                           | 168.4 | University of Washington radar | 5       |
| NPI_2010_SRM_AIR_BM2          | Sør Rondane Mountains; Dronning Maud Land      | Norwegian Polar Institute                                                                                              | <a href="https://doi.org/10.3189/2015AoG70A010">https://doi.org/10.3189/2015AoG70A010</a>           | <a href="https://doi.org/10.1594/PANGAEA.836299">https://doi.org/10.1594/PANGAEA.836299</a> | 0     | Incoherent                           | 168   | AWIRES                         | 150     |
| PRIC_2007_CHINARE-24_GRN_BM2  | Dome A (CHINARE-24)                            | Polar Research Institute of China                                                                                      | <a href="https://doi.org/10.1007/s11434-009-0546-z">https://doi.org/10.1007/s11434-009-0546-z</a>   | -9999                                                                                       | 0     | Incoherent                           | 168   | NIPR radar                     | 179     |
| PRIC_2004_CHINARE-21_GRN_BM2  | Dome A; Zhongshan Station (CHINARE-21)         | Polar Research Institute of China                                                                                      | <a href="https://doi.org/10.1007/s11434-010-3238-9">https://doi.org/10.1007/s11434-010-3238-9</a>   | -9999                                                                                       | 0     | Incoherent                           | 168   | NIPR radar                     | 179     |
| RNRF_2003_48RAEap5_AIR_BM2    | Princess Elizabeth Land                        | Polar Marine Geosurvey Expedition                                                                                      | <a href="https://doi.org/10.1017/aog.2020.4">https://doi.org/10.1017/aog.2020.4</a>                 | -9999                                                                                       | 0     | Incoherent                           | 168   | MPI-60                         | 60      |
| RNRF_2004_49RAEap5_AIR_BM2    | Princess Elizabeth Land                        | Polar Marine Geosurvey Expedition                                                                                      | <a href="https://doi.org/10.1017/aog.2020.4">https://doi.org/10.1017/aog.2020.4</a>                 | -9999                                                                                       | 0     | Incoherent                           | 168   | MPI-60                         | 60      |
| RNRF_2005_50RAEap5_AIR_BM2    | Princess Elizabeth Land                        | Polar Marine Geosurvey Expedition                                                                                      | <a href="https://doi.org/10.1017/aog.2020.4">https://doi.org/10.1017/aog.2020.4</a>                 | -9999                                                                                       | 0     | Incoherent                           | 168   | MPI-60                         | 60      |

|                                           |                                                                                      |                                                                                |                                                                                                               |                                                                                 |     |                            |        |                                        |     |
|-------------------------------------------|--------------------------------------------------------------------------------------|--------------------------------------------------------------------------------|---------------------------------------------------------------------------------------------------------------|---------------------------------------------------------------------------------|-----|----------------------------|--------|----------------------------------------|-----|
| RNRF_2006_51RAEap5_AIR_BM2                | Princess Elizabeth Land                                                              | Polar Marine Geosurvey Expedition                                              | <a href="https://doi.org/10.1017/aog.2020.4">https://doi.org/10.1017/aog.2020.4</a>                           | -9999                                                                           | 0   | Incoherent                 | 168    | MPI-60                                 | 60  |
| RNRF_2006_KV1-area_AIR_BM2                | Princess Elizabeth Land                                                              | Polar Marine Geosurvey Expedition                                              | <a href="https://doi.org/10.1017/aog.2020.4">https://doi.org/10.1017/aog.2020.4</a>                           | -9999                                                                           | 0   | Incoherent                 | 168    | RLS-60-98                              | 60  |
| RNRF_2007_52RAEap5_AIR_BM2                | Princess Elizabeth Land                                                              | Polar Marine Geosurvey Expedition                                              | <a href="https://doi.org/10.1017/aog.2020.4">https://doi.org/10.1017/aog.2020.4</a>                           | -9999                                                                           | 0   | Incoherent                 | 168    | MPI-60                                 | 60  |
| RNRF_2007_Mirny-Vostok_AIR_BM2            | Mirny Station; Vostok traverse                                                       | Polar Marine Geosurvey Expedition                                              | <a href="https://doi.org/10.1017/aog.2020.4">https://doi.org/10.1017/aog.2020.4</a>                           | -9999                                                                           | 0   | Incoherent                 | 168    | RLS-60-98                              | 60  |
| RNRF_2008_Vostok-Subglacial-Lake_AIR_BM2  | Vostok Subglacial Lake                                                               | Polar Marine Geosurvey Expedition                                              | <a href="https://doi.org/10.15356/2076-6734-2012-4-31-38">https://doi.org/10.15356/2076-6734-2012-4-31-38</a> | -9999                                                                           | 0   | Incoherent                 | 168.4  | RLS-60-98                              | 60  |
| RNRF_2008_53RAEap5_AIR_BM2                | Princess Elizabeth Land                                                              | Polar Marine Geosurvey Expedition                                              | <a href="https://doi.org/10.1017/aog.2020.4">https://doi.org/10.1017/aog.2020.4</a>                           | -9999                                                                           | 0   | Incoherent                 | 168    | MPI-60                                 | 60  |
| RNRF_2013_Vostok-Progress_AIR_BM2         | Vostok Station; Progress Station traverse                                            | Polar Marine Geosurvey Expedition                                              | <a href="https://doi.org/10.1017/aog.2020.4">https://doi.org/10.1017/aog.2020.4</a>                           | -9999                                                                           | 0   | Incoherent                 | 168    | RLS-60-06                              | 60  |
| STOLAF_1994_Siple-Dome_GRN_BM2            | Siple Dome                                                                           | St. Olaf College                                                               | <a href="https://doi.org/10.1029/95JB03735">https://doi.org/10.1029/95JB03735</a>                             | <a href="https://doi.org/10.7265/N5Z31WJQ">https://doi.org/10.7265/N5Z31WJQ</a> | 0   | 2-D migration              | 168.5  | St. Olaf College radar                 | 3-5 |
| STOLAF_2001_ITASE-Byrd-Ellsworth_GRN_BM2  | Byrd Ice Core; Ellsworth Mountains (US-ITASE)                                        | St. Olaf College                                                               | <a href="https://doi.org/10.1029/2003GL017210">https://doi.org/10.1029/2003GL017210</a>                       | <a href="https://doi.org/10.7265/N5R20Z9T">https://doi.org/10.7265/N5R20Z9T</a> | 0   | 2-D migration              | 168.5  | St. Olaf College radar                 | 3   |
| STOLAF_2001_ITASE-Ellsworth_GRN_BM2       | Ellsworth Mountains (US-ITASE)                                                       | St. Olaf College                                                               | <a href="https://doi.org/10.1029/2003GL017210">https://doi.org/10.1029/2003GL017210</a>                       | <a href="https://doi.org/10.7265/N5R20Z9T">https://doi.org/10.7265/N5R20Z9T</a> | 0   | 2-D migration              | 168.5  | St. Olaf College radar                 | 3   |
| STOLAF_2002_ITASE-Hercules-Dome_GRN_BM2   | Hercules Dome (US-ITASE)                                                             | St. Olaf College                                                               | <a href="https://doi.org/10.1029/2004JF000188">https://doi.org/10.1029/2004JF000188</a>                       | <a href="https://doi.org/10.7265/N5R20Z9T">https://doi.org/10.7265/N5R20Z9T</a> | 0   | 2-D migration              | 168.5  | St. Olaf College radar                 | 3   |
| STOLAF_2002_ITASE-Byrd-South-Pole_GRN_BM2 | Byrd Ice core; South Pole (US-ITASE)                                                 | St. Olaf College                                                               | <a href="https://doi.org/10.1029/2004JF000188">https://doi.org/10.1029/2004JF000188</a>                       | <a href="https://doi.org/10.7265/N5R20Z9T">https://doi.org/10.7265/N5R20Z9T</a> | 0   | 2-D migration              | 168.5  | St. Olaf College radar                 | 3   |
| UCANTERBURY_2008_Darwin-Hatherton_GRN_BM2 | Darwin–Hatherton glacial system                                                      | Gateway Antarctica University of Canterbury                                    | <a href="https://doi.org/10.1017/jog.2017.60">https://doi.org/10.1017/jog.2017.60</a>                         | -9999                                                                           | 4.7 | Migration                  | 168    | pulseEKKO PRO                          | 25  |
| UTIG_1991_CASERTZ_AIR_BM2                 | Byrd Subglacial Basin; Bindschadler Ice Stream; Kamb Ice Stream; Willians Ice Stream | University of Texas Institute for Geophysics                                   | <a href="https://doi.org/10.1029/AR077p0105">https://doi.org/10.1029/AR077p0105</a>                           | <a href="https://doi.org/10.15784/601588">https://doi.org/10.15784/601588</a>   | 0   | Incoherent log-detectected | 168.37 | SOAR TUD IV (RADsh1, RADgh1 digitizer) | 60  |
| UTIG_1998_West-Marie-Byrd-Land_AIR_BM2    | Western Marie Byrd Land                                                              | University of Texas Institute for Geophysics                                   | <a href="https://doi.org/10.1029/2002GC000462">https://doi.org/10.1029/2002GC000462</a>                       | <a href="https://doi.org/10.7265/N5BZ63ZH">https://doi.org/10.7265/N5BZ63ZH</a> | 0   | Incoherent log-detectected | 168.37 | SOAR TUD IV (RADgh1 digitizer)         | 60  |
| UTIG_1999_SOAR-LVS-WLK_AIR_BM2            | Transantarctic Mountains; South Pole; Lake Vostok; Dome C                            | University of Texas Institute for Geophysics; Lamont-Doherty Earth Observatory | <a href="http://dx.doi.org/10.1016/S0012-821X(04)00066-4">http://dx.doi.org/10.1016/S0012-821X(04)00066-4</a> | <a href="https://doi.org/10.15784/601588">https://doi.org/10.15784/601588</a>   | 0   | Incoherent log-detectected | 168.37 | SOAR TUD IV (RADgh1 digitizer)         | 60  |
| UTIG_2000_Robb-Glacier_AIR_BM2            | Robb Glacier                                                                         | University of Texas Institute for Geophysics                                   | -9999                                                                                                         | <a href="https://doi.org/10.15784/601604">https://doi.org/10.15784/601604</a>   | 0   | Incoherent log-detectected | 168.37 | SOAR TUD IV (RADgh1 digitizer)         | 60  |

|                          |                                          |                                              |                                                                                           |                                                                                         |   |                                      |       |        |    |
|--------------------------|------------------------------------------|----------------------------------------------|-------------------------------------------------------------------------------------------|-----------------------------------------------------------------------------------------|---|--------------------------------------|-------|--------|----|
| UTIG_2004_AGASEA_AIR_BM2 | Thwaites Glacier; Smith Glacier (AGASEA) | University of Texas Institute for Geophysics | <a href="https://doi.org/10.1029/2005GL025561">https://doi.org/10.1029/2005GL025561</a>   | <a href="https://doi.org/10.7265/N5W95730">https://doi.org/10.7265/N5W95730</a>         | 0 | 2-D Synthetic Aperture Radar focused | 168.4 | HICARS | 60 |
| UTIG_2008_ICECAP_AIR_BM2 | Aurora Subglacial Basin                  | University of Texas Institute for Geophysics | <a href="http://dx.doi.org/10.1038/nature10114">http://dx.doi.org/10.1038/nature10114</a> | <a href="https://doi.org/10.5067/F5FGUT9F5089">https://doi.org/10.5067/F5FGUT9F5089</a> | 0 | pik1 (short coherent)                | 168.4 | HICARS | 60 |



Table S2. List of survey data added as part of the Bedmap3 release. . For each survey we provide the project name, institution, reference, source (DOI), firm correction, history, electromagnetic wave speed in ice, instrument used for acquisition and the centre frequency.

| filename                          | project                               | institution                                                         | reference                                                                                       | source                                                                                                                                        | firm correction | history                              | electromagnet<br>ic wave speed<br>in ice | instrument          | centre<br>frequency |
|-----------------------------------|---------------------------------------|---------------------------------------------------------------------|-------------------------------------------------------------------------------------------------|-----------------------------------------------------------------------------------------------------------------------------------------------|-----------------|--------------------------------------|------------------------------------------|---------------------|---------------------|
| AWI_2013_GEA-IV_AIR_BM3           | Dronning Maud Land (GEA-IV)           | Alfred Wegener Institute;<br>Bundesanstalt für<br>Geowissenschaften | <a href="https://doi.org/10.1016/j.gr.2018.05.011">https://doi.org/10.1016/j.gr.2018.05.011</a> | <a href="https://doi.org/10.1594/PANGAEA.938357">https://doi.org/10.1594/PANGAEA.938357</a>                                                   | 10              | Incoherent                           | 167.0                                    | AWI EMR             | 150                 |
| AWI_2014_Recovery-Glacier_AIR_BM3 | Recovery Glacier                      | Alfred Wegener Institute                                            | <a href="https://doi.org/10.1029/2017JF004591">https://doi.org/10.1029/2017JF004591</a>         | <a href="https://doi.org/10.1594/PANGAEA.894292">https://doi.org/10.1594/PANGAEA.894292</a>                                                   | 0               | Incoherent                           | 168.1                                    | AWI EMR             | 150                 |
| AWI_2015_GEA-DML_AIR_BM3          | Dronning Maud Land (GEA)              | Alfred Wegener Institute;<br>Bundesanstalt für<br>Geowissenschaften | <a href="https://doi.org/10.1016/j.gr.2018.05.011">https://doi.org/10.1016/j.gr.2018.05.011</a> | <a href="https://doi.pangaea.de/10.1594/PANGAEA.915475">https://doi.pangaea.de/10.1594/PANGAEA.915475</a>                                     | 0               | Incoherent                           | 168.0                                    | AWI EMR             | 150                 |
| AWI_2016_OIR_AIR_BM3              | Dome Fuji (Oldest Ice Reconnaissance) | Alfred Wegener Institute                                            | <a href="https://doi.org/10.5194/tc-12-2413-2018">https://doi.org/10.5194/tc-12-2413-2018</a>   | <a href="https://doi.pangaea.de/10.1594/PANGAEA.891323">https://doi.pangaea.de/10.1594/PANGAEA.891323</a>                                     | 10              | Incoherent                           | 167.0                                    | AWI EMR             | 150                 |
| AWI_2018_DML-Coast_AIR_BM3        | Dronning Maud Land coast              | Alfred Wegener Institute;<br>Tübingen University                    | -9999                                                                                           | <a href="https://doi.pangaea.de/10.1594/PANGAEA.911868">https://doi.pangaea.de/10.1594/PANGAEA.911868</a>                                     | 0               | 2D Synthetic Aperture Radar focussed | 168.9                                    | AWI UWB (MCoRDS v5) | 195                 |
| AWI_2018_ANIRES_AIR_BM3           | Dronning Maud Land (AniRES)           | Tübingen University; Alfred Wegener Institute                       | -9999                                                                                           | -9999                                                                                                                                         | 8               | Incoherent                           | 168.0                                    | AWI EMR             | 150                 |
| AWI_2018_JURAS_AIR_BM3            | Jutulstraumen Ice Stream (JURAS)      | Alfred Wegener Institute                                            | <a href="https://doi.org/10.1002/esp.5203">https://doi.org/10.1002/esp.5203</a>                 | <a href="https://doi.org/10.1594/PANGAEA.911475">https://doi.org/10.1594/PANGAEA.911475</a>                                                   | 0               | 2D Synthetic Aperture Radar focussed | 168.9                                    | AWI UWB (MCoRDS v5) | 195                 |
| AWI_2019_JURAS_AIR_BM3            | Jutulstraumen Ice Stream (JURAS)      | Alfred Wegener Institute                                            | -9999                                                                                           | <a href="https://doi.pangaea.de/10.1594/PANGAEA.910019">https://doi.pangaea.de/10.1594/PANGAEA.910019</a>                                     | 0               | 2D Synthetic Aperture Radar focussed | 168.9                                    | AWI UWB (MCoRDS v5) | 195                 |
| BAS_2007_Lake-Ellsworth_GRN_BM3   | Lake Ellsworth                        | British Antarctic Survey;<br>Newcastle University                   | <a href="https://doi.org/10.1017/aog.2020.50">https://doi.org/10.1017/aog.2020.50</a>           | -9999                                                                                                                                         | 0               | 2-D migration                        | 168                                      | DELORES             | 2                   |
| BAS_2007_Rutford_GRN_BM3          | Rutford Ice Stream                    | British Antarctic Survey                                            | <a href="https://doi.org/10.5194/essd-8-151-2016">https://doi.org/10.5194/essd-8-151-2016</a>   | <a href="https://dx.doi.org/10.5285/54757cbe-0b13-4385-8b31-4dfaa1dab55e">https://dx.doi.org/10.5285/54757cbe-0b13-4385-8b31-4dfaa1dab55e</a> | 10              | 2-D migration                        | 167                                      | DELORES             | 3                   |
| BAS_2008_Lake-Ellsworth_GRN_BM3   | Lake Ellsworth                        | British Antarctic Survey;<br>Newcastle University                   | <a href="https://doi.org/10.1017/aog.2020.50">https://doi.org/10.1017/aog.2020.50</a>           | -9999                                                                                                                                         | 0               | 2-D migration                        | 168                                      | DELORES             | 2                   |
| BAS_2010_IMAFI_AIR_BM3            | Institute-Möller Ice Stream (IMAFI)   | British Antarctic Survey                                            | <a href="https://doi.org/10.1038/ngeo1468">https://doi.org/10.1038/ngeo1468</a>                 | <a href="https://doi.org/10.5285/7946c497-72fc-41cb-a9b2-bf9980efe156">https://doi.org/10.5285/7946c497-72fc-41cb-a9b2-bf9980efe156</a>       | 10              | 2-D Synthetic Aperture Radar         | 168                                      | PASIN               | 150                 |
| BAS_2011_Adelaide_AIR_BM3         | Adelaide Island                       | British Antarctic Survey                                            | <a href="https://doi.org/10.1093/gji/ggu233">https://doi.org/10.1093/gji/ggu233</a>             | -9999                                                                                                                                         | 10              | 2-D Synthetic Aperture Radar         | 168                                      | PASIN               | 150                 |
| BAS_2012_Castle_GRN_BM3           | Pine Island Glacier                   | British Antarctic Survey                                            | -9999                                                                                           | -9999                                                                                                                                         | 10              | 2-D Synthetic Aperture Radar         | 168                                      | DELORES             | 2                   |

|                                        |                                                |                                                   |                                                                                                       |                                                                                                                                           |       |                                    |        |                     |         |
|----------------------------------------|------------------------------------------------|---------------------------------------------------|-------------------------------------------------------------------------------------------------------|-------------------------------------------------------------------------------------------------------------------------------------------|-------|------------------------------------|--------|---------------------|---------|
| BAS_2012_ICEGRAV_AIR_BM3               | Recovery Catchment (ICEGRAV)                   | British Antarctic Survey                          | <a href="https://doi.org/10.1144/SP461.17">https://doi.org/10.1144/SP461.17</a>                       | <a href="https://doi.org/10.5285/6549203d-da8b-4a22-924b-a9e1471ea7f1">https://doi.org/10.5285/6549203d-da8b-4a22-924b-a9e1471ea7f1</a>   | 10    | 2-D Synthetic Aperture Radar       | 168    | PASIN               | 150     |
| BAS_2013_ISTAR_GRN_BM3                 | Pine Island Glacier (iSTAR)                    | British Antarctic Survey; University of Edinburgh | <a href="https://doi.org/10.1038/s41467-017-01597-y">https://doi.org/10.1038/s41467-017-01597-y</a>   | -9999                                                                                                                                     | 10    | 2-D migration                      | 168    | DELORES             | 2       |
| BAS_2015_POLARGAP_AIR_BM3              | South Pole (PolarGAP)                          | British Antarctic Survey; European Space Agency   | <a href="https://doi.org/10.1038/s41598-018-35182-0">https://doi.org/10.1038/s41598-018-35182-0</a>   | <a href="https://doi.org/10.5270/es-a-8ffoo3e">https://doi.org/10.5270/es-a-8ffoo3e</a>                                                   | 10    | 2-D Synthetic Aperture Radar       | 168    | PASIN               | 150     |
| BAS_2015_FISS_AIR_BM3                  | Filchner Ice Shelf System (FISS)               | British Antarctic Survey                          | <a href="https://doi.org/10.5194/tc-15-1517-2021">https://doi.org/10.5194/tc-15-1517-2021</a>         | <a href="https://doi.org/10.5285/144ceb0d-9d76-4a39-aa01-7b94ac80fac9">https://doi.org/10.5285/144ceb0d-9d76-4a39-aa01-7b94ac80fac9</a>   | 10    | 2-D Synthetic Aperture Radar       | 168    | PASIN               | 150     |
| BAS_2016_FISS_AIR_BM3                  | Filchner Ice Shelf System (FISS)               | British Antarctic Survey                          | <a href="https://doi.org/10.5194/essd-14-3379-2022">https://doi.org/10.5194/essd-14-3379-2022</a>     | <a href="https://doi.org/10.5285/e7851bba-21ff-4645-b557-d8eafdf89462">https://doi.org/10.5285/e7851bba-21ff-4645-b557-d8eafdf89462</a>   | 10    | 2-D Synthetic Aperture Radar       | 168    | PASIN               | 150     |
| BAS_2017_English-Coast_AIR_BM3         | English Coast                                  | British Antarctic Survey                          | <a href="https://doi.org/10.5194/essd-14-3379-2022">https://doi.org/10.5194/essd-14-3379-2022</a>     | <a href="https://doi.org/10.5285/e07d62bf-d58c-4187-a019-59be998939cc">https://doi.org/10.5285/e07d62bf-d58c-4187-a019-59be998939cc</a>   | 10    | 2-D Synthetic Aperture Radar       | 168    | PASIN               | 150     |
| BAS_2018_Thwaites_AIR_BM3              | Thwaites Glacier (ITGC)                        | British Antarctic Survey                          | <a href="https://doi.org/10.5194/tc-14-2869-2020">https://doi.org/10.5194/tc-14-2869-2020</a>         | <a href="https://data.cresis.ku.edu/">https://data.cresis.ku.edu/</a>                                                                     | 10    | 2-D Synthetic Aperture Radar       | 168    | PASIN               | 150     |
| BAS_2019_Thwaites_AIR_BM3              | Thwaites Glacier (ITGC)                        | British Antarctic Survey                          | <a href="https://doi.org/10.5194/essd-14-3379-2022">https://doi.org/10.5194/essd-14-3379-2022</a>     | <a href="https://doi.org/10.5285/7c12898d-7e55-458c-ba7d-eccec8252f3b5">https://doi.org/10.5285/7c12898d-7e55-458c-ba7d-eccec8252f3b5</a> | 10    | 2-D Synthetic Aperture Radar       | 168    | PASIN               | 150     |
| CRESIS_2009_Thwaites_AIR_BM3           | Thwaites Glacier                               | Center for Remote Sensing of Ice Sheets           | <a href="https://doi.org/10.1130/g46772.1">https://doi.org/10.1130/g46772.1</a>                       | <a href="http://hdl.handle.net/1773/44950">http://hdl.handle.net/1773/44950</a>                                                           | 0     | MUSIC (Swath) Processing           | 168.91 | MCoRDS              | 150     |
| CRESIS_2009_Antarctica-TO_AIR_BM3      | Thwaites Glacier; Pine Island Glacier          | Center for Remote Sensing of Ice Sheets           | <a href="https://doi.org/10.1130/g46772.1">https://doi.org/10.1130/g46772.1</a>                       | <a href="https://doi.org/10.7910/DVN/M4C540">https://doi.org/10.7910/DVN/M4C540</a>                                                       | 0     | Synthetic Aperture Radar focused   | 168.91 | MCoRDS              | 150     |
| CRESIS_2013_Siple-Coast_AIR_BM3        | Siple Coast                                    | Center for Remote Sensing of Ice Sheets           | <a href="https://doi.org/10.1109/JSTARS.2015.2403611">https://doi.org/10.1109/JSTARS.2015.2403611</a> | <a href="https://data.cresis.ku.edu/">https://data.cresis.ku.edu/</a>                                                                     | 0     | Synthetic Aperture Radar focused   | 168.91 | MCoRDS v4           | 150-450 |
| CECS_2006_Subglacial-Lake-CECs_GRN_BM3 | Subglacial Lake Centro de Estudios Científicos | Centro de Estudios Científicos                    | <a href="https://doi.org/10.1002/2015GL063390">https://doi.org/10.1002/2015GL063390</a>               | -9999                                                                                                                                     | -9999 | Synthetic Aperture Radar unfocused | 168    | CECS radar          | 155     |
| INGV_1997_Talos-Dome_AIR_BM3           | Talos Dome; Terre Adelie                       | Istituto Nazionale di Geofisica e Vulcanologia    | <a href="https://doi.org/10.4401/ag-3471">https://doi.org/10.4401/ag-3471</a>                         | -9999                                                                                                                                     | -9999 | -9999                              | 168    | INGV-IT GlacioRadar | 60      |
| INGV_1999_Talos-Dome_AIR_BM3           | Talos Dome; Terre Adelie                       | Istituto Nazionale di Geofisica e Vulcanologia    | <a href="https://doi.org/10.4401/ag-3471">https://doi.org/10.4401/ag-3471</a>                         | -9999                                                                                                                                     | -9999 | -9999                              | 168    | INGV-IT GlacioRadar | 60      |
| INGV_2001_Talos-Dome_AIR_BM3           | Talos Dome; Oats Land                          | Istituto Nazionale di Geofisica e Vulcanologia    | -9999                                                                                                 | -9999                                                                                                                                     | -9999 | -9999                              | 168    | INGV-IT GlacioRadar | 150     |
| INGV_2003_Talos-Dome_AIR_BM3           | Talos Dome; Queen Mary Land; Terre Adelie      | Istituto Nazionale di Geofisica e Vulcanologia    | -9999                                                                                                 | -9999                                                                                                                                     | -9999 | -9999                              | 168    | INGV-IT GlacioRadar | 60      |

|                           |                          |                                                                                                    |                                                                                               |                                                                                                                                                                                                                                                                                                                                                                                                                                                                                                                                                                                                                                                                                       |       |                              |       |                   |         |
|---------------------------|--------------------------|----------------------------------------------------------------------------------------------------|-----------------------------------------------------------------------------------------------|---------------------------------------------------------------------------------------------------------------------------------------------------------------------------------------------------------------------------------------------------------------------------------------------------------------------------------------------------------------------------------------------------------------------------------------------------------------------------------------------------------------------------------------------------------------------------------------------------------------------------------------------------------------------------------------|-------|------------------------------|-------|-------------------|---------|
| LDEO_2015_ROSETTA_AIR_BM3 | Ross Ice Shelf (ROSETTA) | Lamont-Doherty Earth Observatory                                                                   | <a href="https://doi.org/10.1029/2019JF005241">https://doi.org/10.1029/2019JF005241</a>       | <a href="http://www.ldeo.columbia.edu/polar-geophysics-group/data">http://www.ldeo.columbia.edu/polar-geophysics-group/data</a>                                                                                                                                                                                                                                                                                                                                                                                                                                                                                                                                                       | 0     | 1-D Synthetic Aperture Radar | 168   | DICE IcePod       | 188     |
| NIPR_1992_JARE33_GRN_BM3  | Dome Fuji (JARE33)       | Japanese Antarctic Research Expedition; National Institute of Polar Research                       | <a href="https://doi.org/10.1029/1999JB900034">https://doi.org/10.1029/1999JB900034</a>       | <a href="https://doi.org/10.17592/01.2021110902">https://doi.org/10.17592/01.2021110902</a>                                                                                                                                                                                                                                                                                                                                                                                                                                                                                                                                                                                           | -9999 | Incoherent                   | 168.7 | VHF179            | 179     |
| NIPR_1996_JARE37_GRN_BM3  | Dome Fuji (JARE37)       | Japanese Antarctic Research Expedition; National Institute of Polar Research                       | <a href="https://doi.org/10.1029/1999JB900034">https://doi.org/10.1029/1999JB900034</a>       | <a href="https://doi.org/10.17592/01.2021110903">https://doi.org/10.17592/01.2021110903</a><br><a href="https://doi.org/10.17592/01.2022072001">https://doi.org/10.17592/01.2022072001</a>                                                                                                                                                                                                                                                                                                                                                                                                                                                                                            | -9999 | Incoherent                   | 168.7 | VHF179            | 179     |
| NIPR_1999_JARE40_GRN_BM3  | Dome Fuji (JARE40)       | Japanese Antarctic Research Expedition; National Institute of Polar Research                       | <a href="https://doi.org/10.1029/2003JB002425">https://doi.org/10.1029/2003JB002425</a>       | <a href="https://doi.org/10.17592/01.2021110904">https://doi.org/10.17592/01.2021110904</a>                                                                                                                                                                                                                                                                                                                                                                                                                                                                                                                                                                                           | -9999 | Incoherent                   | 168.7 | VHF179            | 179     |
| NIPR_2007_JARE49_GRN_BM3  | Dome Fuji (JARE49)       | Japanese Antarctic Research Expedition; National Institute of Polar Research                       | <a href="https://doi.org/10.5194/tc-6-1203-2012">https://doi.org/10.5194/tc-6-1203-2012</a>   | <a href="https://doi.org/10.17592/01.2022072203">https://doi.org/10.17592/01.2022072203</a><br><a href="https://doi.org/10.17592/01.2022072204">https://doi.org/10.17592/01.2022072204</a><br><a href="https://doi.org/10.17592/01.2021110905">https://doi.org/10.17592/01.2021110905</a><br><a href="https://doi.org/10.17592/01.2021110906">https://doi.org/10.17592/01.2021110906</a>                                                                                                                                                                                                                                                                                              | -9999 | Coherent;<br>Incoherent      | 168.7 | POL179;<br>VHF60  | 179; 60 |
| NIPR_2007_JASE_GRN_BM3    | Dome Fuji (JASE)         | Japanese Antarctic Research Expedition; National Institute of Polar Research; Stockholm University | <a href="https://doi.org/10.5194/tc-6-1203-2012">https://doi.org/10.5194/tc-6-1203-2012</a>   | <a href="https://doi.org/10.17592/01.2022072205">https://doi.org/10.17592/01.2022072205</a><br><a href="https://doi.org/10.17592/01.2022072206">https://doi.org/10.17592/01.2022072206</a><br><a href="https://doi.org/10.17592/01.2022072207">https://doi.org/10.17592/01.2022072207</a><br><a href="https://doi.org/10.17592/01.2022072208">https://doi.org/10.17592/01.2022072208</a><br><a href="https://doi.org/10.17592/01.2022072209">https://doi.org/10.17592/01.2022072209</a><br><a href="https://doi.org/10.17592/01.2022072210">https://doi.org/10.17592/01.2022072210</a><br><a href="https://doi.org/10.17592/01.2022072211">https://doi.org/10.17592/01.2022072211</a> | -9999 | Incoherent                   | 168.7 | VHF179            | 179     |
| NIPR_2012_JARE54_GRN_BM3  | Dome Fuji (JARE54)       | Japanese Antarctic Research Expedition; National Institute of Polar Research                       | <a href="https://doi.org/10.5194/tc-16-2967-2022">https://doi.org/10.5194/tc-16-2967-2022</a> | <a href="https://doi.org/10.17592/01.2021110907">https://doi.org/10.17592/01.2021110907</a>                                                                                                                                                                                                                                                                                                                                                                                                                                                                                                                                                                                           | -9999 | Coherent                     | 168.7 | POL179            | 179     |
| NIPR_2017_JARE59_GRN_BM3  | Dome Fuji (JARE59)       | Japanese Antarctic Research Expedition; National Institute of Polar Research                       | <a href="https://doi.org/10.5194/tc-16-2967-2022">https://doi.org/10.5194/tc-16-2967-2022</a> | <a href="https://doi.org/10.17592/01.2021110908">https://doi.org/10.17592/01.2021110908</a><br><a href="https://doi.org/10.17592/01.2021110909">https://doi.org/10.17592/01.2021110909</a>                                                                                                                                                                                                                                                                                                                                                                                                                                                                                            | -9999 | Coherent;<br>Incoherent      | 168.7 | POL179;<br>VHF179 | 179     |



|                             |                                      |                                                                              |                                                                                                   |                                                                                                             |       |                                       |        |                      |                  |
|-----------------------------|--------------------------------------|------------------------------------------------------------------------------|---------------------------------------------------------------------------------------------------|-------------------------------------------------------------------------------------------------------------|-------|---------------------------------------|--------|----------------------|------------------|
| NIPR_2018_JARE60_GRN_BM3    | Dome Fuji (JARE60)                   | Japanese Antarctic Research Expedition; National Institute of Polar Research | <a href="https://doi.org/10.5194/tc-16-2967-2022">https://doi.org/10.5194/tc-16-2967-2022</a>     | <a href="http://doi.org/10.17592/001.2021110910">http://doi.org/10.17592/001.2021110910</a>                 | -9999 | Incoherent                            | 168.7  | VHF179               | 179              |
| KOPRI_2017_KRT1_AIR_BM3     | David Glacier (KRT1)                 | Korea Polar Research Institute                                               | <a href="https://doi.org/10.5194/tc-14-2217-2020">https://doi.org/10.5194/tc-14-2217-2020</a>     | <a href="https://doi.org/10.5281/zenodo.3778452">https://doi.org/10.5281/zenodo.3778452</a>                 | 0     | 2-D Synthetic Aperture Radar focusing | 168.42 | MARFA (UTIG)         | 60               |
| KOPRI_2018_KRT2_AIR_BM3     | David Glacier (KRT2)                 | Korea Polar Research Institute                                               | <a href="https://doi.org/10.5194/tc-14-2217-2020">https://doi.org/10.5194/tc-14-2217-2020</a>     | <a href="https://doi.org/10.5281/zenodo.3778452">https://doi.org/10.5281/zenodo.3778452</a>                 | 0     | 2-D Synthetic Aperture Radar focusing | 168.42 | MARFA (UTIG)         | 60               |
| NASA_2013_ICEBRIDGE_AIR_BM3 | NASA Operation IceBridge             | Center for Remote Sensing of Ice Sheets                                      | <a href="https://doi.org/10.1029/2020RG000712">https://doi.org/10.1029/2020RG000712</a>           | <a href="https://data.cresis.ku.edu/">https://data.cresis.ku.edu/</a>                                       | 0     | 2-D Synthetic Aperture Radar focused  | 169    | MCoRDS V3            | 180-210          |
| NASA_2014_ICEBRIDGE_AIR_BM3 | NASA Operation IceBridge             | Center for Remote Sensing of Ice Sheets                                      | <a href="https://doi.org/10.1029/2020RG000712">https://doi.org/10.1029/2020RG000712</a>           | <a href="https://data.cresis.ku.edu/">https://data.cresis.ku.edu/</a>                                       | 0     | 2-D Synthetic Aperture Radar focused  | 169    | MCoRDS V2            | 165-215          |
| NASA_2016_ICEBRIDGE_AIR_BM3 | NASA Operation IceBridge             | Center for Remote Sensing of Ice Sheets                                      | <a href="https://doi.org/10.1029/2020RG000712">https://doi.org/10.1029/2020RG000712</a>           | <a href="https://data.cresis.ku.edu/">https://data.cresis.ku.edu/</a>                                       | 0     | 2-D Synthetic Aperture Radar focused  | 169    | MCoRDS V2            | 165-215          |
| NASA_2017_ICEBRIDGE_AIR_BM3 | NASA Operation IceBridge             | Center for Remote Sensing of Ice Sheets                                      | <a href="https://doi.org/10.1029/2020RG000712">https://doi.org/10.1029/2020RG000712</a>           | <a href="https://data.cresis.ku.edu/">https://data.cresis.ku.edu/</a>                                       | 0     | 2-D Synthetic Aperture Radar focused  | 169    | MCoRDS V3; MCoRDS v6 | 180-210; 150-450 |
| NASA_2018_ICEBRIDGE_AIR_BM3 | NASA Operation IceBridge             | Center for Remote Sensing of Ice Sheets                                      | <a href="https://doi.org/10.1029/2020RG000712">https://doi.org/10.1029/2020RG000712</a>           | <a href="https://data.cresis.ku.edu/">https://data.cresis.ku.edu/</a>                                       | 0     | 2-D Synthetic Aperture Radar focused  | 169    | MCoRDS V2            | 165-215          |
| NASA_2019_ICEBRIDGE_AIR_BM3 | NASA Operation IceBridge             | Center for Remote Sensing of Ice Sheets                                      | <a href="https://doi.org/10.1029/2020RG000712">https://doi.org/10.1029/2020RG000712</a>           | <a href="https://data.cresis.ku.edu/">https://data.cresis.ku.edu/</a>                                       | 0     | 2-D Synthetic Aperture Radar focused  | 169    | MCoRDS V7            | 236-254          |
| NPI_2012_ICERISES_GRN_BM3   | Dronning Maud Land ice rises         | Norwegian Polar Institute                                                    | <a href="https://doi.org/10.5194/tc-11-2883-2017">https://doi.org/10.5194/tc-11-2883-2017</a>     | <a href="https://doi.org/10.21334/npolar.2019.50edbccc2">https://doi.org/10.21334/npolar.2019.50edbccc2</a> | 5     | Incoherent                            | 169    | NPI radar            | 2                |
| NPI_2015_POLARGAP_AIR_BM3   | Recovery Subglacial Lakes (PolarGAP) | Norwegian Polar Institute                                                    | <a href="https://doi.org/10.1029/2018JF004799">https://doi.org/10.1029/2018JF004799</a>           | <a href="https://doi.org/10.21334/npolar.2019.ae99f750">https://doi.org/10.21334/npolar.2019.ae99f750</a>   | 10    | 2-D Synthetic Aperture Radar          | 168.5  | PASIN (BAS)          | 150              |
| NPI_2016_MADICE_GRN_BM3     | Dronning Maud Land (MADICE)          | Norwegian Polar Institute                                                    | <a href="https://doi.org/10.5194/tc-13-2579-2019">https://doi.org/10.5194/tc-13-2579-2019</a>     | <a href="https://doi.org/10.21334/npolar.2020.9ca8826d">https://doi.org/10.21334/npolar.2020.9ca8826d</a>   | 2     | Incoherent                            | 168    | NPI radar            | 5                |
| PRIC_2015_CHA1_AIR_BM3      | Princess Elizabeth Land (CHA1)       | Polar Research Institute of China                                            | <a href="https://doi.org/10.5194/essd-12-2765-2020">https://doi.org/10.5194/essd-12-2765-2020</a> | <a href="https://doi.org/10.5281/zenodo.4023393">https://doi.org/10.5281/zenodo.4023393</a>                 | 0     | 2-D Synthetic Aperture Radar focused  | 168    | HiCARS (UTIG)        | 60               |
| PRIC_2016_CHA2_AIR_BM3      | Princess Elizabeth Land (CHA2)       | Polar Research Institute of China                                            | <a href="https://doi.org/10.5194/essd-12-2765-2020">https://doi.org/10.5194/essd-12-2765-2020</a> | <a href="https://doi.org/10.5281/zenodo.4023393">https://doi.org/10.5281/zenodo.4023393</a>                 | 0     | 2-D Synthetic Aperture Radar focused  | 168    | HiCARS (UTIG)        | 60               |

|                                  |                                               |                                   |                                                                                                     |                                                                                             |       |                                  |       |               |       |
|----------------------------------|-----------------------------------------------|-----------------------------------|-----------------------------------------------------------------------------------------------------|---------------------------------------------------------------------------------------------|-------|----------------------------------|-------|---------------|-------|
| PRIC_2017_CHA3_AIR_BM3           | Princess Elizabeth Land (CHA3)                | Polar Research Institute of China | <a href="https://doi.org/10.5194/essd-12-2765-2020">https://doi.org/10.5194/essd-12-2765-2020</a>   | <a href="https://doi.org/10.5281/zenodo.4023393">https://doi.org/10.5281/zenodo.4023393</a> | 0     | Coherent and incoherent stacking | 168   | HiCARS (UTIG) | 60    |
| PRIC_2018_CHA4_AIR_BM3           | Princess Elizabeth Land (CHA4)                | Polar Research Institute of China | <a href="https://doi.org/10.5194/essd-12-2765-2020">https://doi.org/10.5194/essd-12-2765-2020</a>   | <a href="https://doi.org/10.5281/zenodo.4023393">https://doi.org/10.5281/zenodo.4023393</a> | 0     | Coherent and incoherent stacking | 168   | HiCARS (UTIG) | 60    |
| RNRF_1971_Lambert-Amery_SEI_BM3  | Lambert Ice Shelf; Amery Ice Shelf            | Polar Marine Geosurvey Expedition | <a href="https://doi.org/10.31857/S2076673421040110">https://doi.org/10.31857/S2076673421040110</a> | -9999                                                                                       | -9999 | -9999                            | -9999 | seismic       | -9999 |
| RNRF_1975_Lazarev_SEI_BM3        | Lazarev Ice Shelf                             | Polar Marine Geosurvey Expedition | <a href="https://doi.org/10.31857/S2076673421040110">https://doi.org/10.31857/S2076673421040110</a> | -9999                                                                                       | -9999 | -9999                            | -9999 | seismic       | -9999 |
| RNRF_1975_Filchner-Ronne_SEI_BM3 | Filchner Ronne Ice Shelf                      | Polar Marine Geosurvey Expedition | <a href="https://doi.org/10.31857/S2076673421040110">https://doi.org/10.31857/S2076673421040110</a> | -9999                                                                                       | -9999 | -9999                            | -9999 | seismic       | -9999 |
| RNRF_2003_AMSap5_AIR_BM3         | Princess Elizabeth Land                       | Polar Marine Geosurvey Expedition | <a href="https://doi.org/10.1017/aog.2020.4">https://doi.org/10.1017/aog.2020.4</a>                 | -9999                                                                                       | 0     | Incoherent                       | 168   | MPI-60        | 60    |
| RNRF_2004_AMSap5_AIR_BM3         | Princess Elizabeth Land                       | Polar Marine Geosurvey Expedition | <a href="https://doi.org/10.1017/aog.2020.4">https://doi.org/10.1017/aog.2020.4</a>                 | -9999                                                                                       | 0     | Incoherent                       | 168   | MPI-60        | 60    |
| RNRF_2004_Mirny-Vostok_AIR_BM3   | Mirny Station; Vostok Subglacial Lake         | Polar Marine Geosurvey Expedition | <a href="https://doi.org/10.1017/aog.2020.4">https://doi.org/10.1017/aog.2020.4</a>                 | -9999                                                                                       | 0     | Incoherent                       | 168   | MPI-60        | 60    |
| RNRF_2005_AMSap5_AIR_BM3         | Princess Elizabeth Land                       | Polar Marine Geosurvey Expedition | <a href="https://doi.org/10.1017/aog.2020.4">https://doi.org/10.1017/aog.2020.4</a>                 | -9999                                                                                       | 0     | Incoherent                       | 168   | MPI-60        | 60    |
| RNRF_2006_RAEap5_AIR_BM3         | Princess Elizabeth Land                       | Polar Marine Geosurvey Expedition | <a href="https://doi.org/10.1017/aog.2020.4">https://doi.org/10.1017/aog.2020.4</a>                 | -9999                                                                                       | 0     | Incoherent                       | 168   | MPI-60        | 60    |
| RNRF_2006_Komsom-Vostok_AIR_BM3  | Komsomolskaya Station; Vostok Subglacial Lake | Polar Marine Geosurvey Expedition | <a href="https://doi.org/10.1017/aog.2020.4">https://doi.org/10.1017/aog.2020.4</a>                 | -9999                                                                                       | 0     | Incoherent                       | 168   | MPI-60        | 60    |
| RNRF_2007_AMSap5_AIR_BM3         | Princess Elizabeth Land                       | Polar Marine Geosurvey Expedition | <a href="https://doi.org/10.1017/aog.2020.4">https://doi.org/10.1017/aog.2020.4</a>                 | -9999                                                                                       | 0     | Incoherent                       | 168   | MPI-60        | 60    |
| RNRF_2008_AMSap5_AIR_BM3         | Princess Elizabeth Land                       | Polar Marine Geosurvey Expedition | <a href="https://doi.org/10.1017/aog.2020.4">https://doi.org/10.1017/aog.2020.4</a>                 | -9999                                                                                       | 0     | Incoherent                       | 168   | MPI-60        | 60    |
| RNRF_2009_RAEap5_AIR_BM3         | Princess Elizabeth Land                       | Polar Marine Geosurvey Expedition | <a href="https://doi.org/10.1017/aog.2020.4">https://doi.org/10.1017/aog.2020.4</a>                 | -9999                                                                                       | 0     | Incoherent                       | 168   | MPI-60        | 60    |
| RNRF_2010_RAE_AIR_BM3            | Princess Elizabeth Land                       | Polar Marine Geosurvey Expedition | <a href="https://doi.org/10.1017/aog.2020.4">https://doi.org/10.1017/aog.2020.4</a>                 | -9999                                                                                       | 0     | Incoherent                       | 168   | MPI-60        | 60    |
| RNRF_2011_RAE_AIR_BM3            | Princess Elizabeth Land                       | Polar Marine Geosurvey Expedition | <a href="https://doi.org/10.1017/aog.2020.4">https://doi.org/10.1017/aog.2020.4</a>                 | -9999                                                                                       | 0     | Incoherent                       | 168   | MPI-60        | 60    |
| RNRF_2013_RAE_AIR_BM3            | Princess Elizabeth Land                       | Polar Marine Geosurvey Expedition | <a href="https://doi.org/10.1017/aog.2020.4">https://doi.org/10.1017/aog.2020.4</a>                 | -9999                                                                                       | 0     | Incoherent                       | 168   | MPI-60        | 60    |
| RNRF_2014_RAE_AIR_BM3            | Princess Elizabeth Land                       | Polar Marine Geosurvey Expedition | <a href="https://doi.org/10.1017/aog.2020.4">https://doi.org/10.1017/aog.2020.4</a>                 | -9999                                                                                       | 0     | Incoherent                       | 168   | MPI-60        | 60    |
| RNRF_2015_RAE_AIR_BM3            | Princess Elizabeth Land                       | Polar Marine Geosurvey Expedition | <a href="https://doi.org/10.1017/aog.2020.4">https://doi.org/10.1017/aog.2020.4</a>                 | -9999                                                                                       | 0     | Incoherent                       | 168   | MPI-60        | 60    |

|                                          |                                       |                                              |                                                                                               |                                                                                                         |       |                                      |       |                                |         |
|------------------------------------------|---------------------------------------|----------------------------------------------|-----------------------------------------------------------------------------------------------|---------------------------------------------------------------------------------------------------------|-------|--------------------------------------|-------|--------------------------------|---------|
| RNRF_2016_RAE_AIR_BM3                    | Princess Elizabeth Land               | Polar Marine Geosurvey Expedition            | <a href="https://doi.org/10.1017/aog.2020.4">https://doi.org/10.1017/aog.2020.4</a>           | -9999                                                                                                   | 0     | Incoherent                           | 168   | MPI-60                         | 60      |
| RNRF_2017_RAE_AIR_BM3                    | Princess Elizabeth Land               | Polar Marine Geosurvey Expedition            | <a href="https://doi.org/10.1017/aog.2020.4">https://doi.org/10.1017/aog.2020.4</a>           | -9999                                                                                                   | 0     | Incoherent                           | 168   | MPI-60                         | 60      |
| RNRF_2018_RAE_AIR_BM3                    | Princess Elizabeth Land               | Polar Marine Geosurvey Expedition            | <a href="https://doi.org/10.1017/aog.2020.4">https://doi.org/10.1017/aog.2020.4</a>           | -9999                                                                                                   | 0     | Incoherent                           | 168   | MPI-60                         | 60      |
| RNRF_2019_RAE_AIR_BM3                    | Princess Elizabeth Land               | Polar Marine Geosurvey Expedition            | <a href="https://doi.org/10.1017/aog.2020.4">https://doi.org/10.1017/aog.2020.4</a>           | -9999                                                                                                   | 0     | Incoherent                           | 168   | MPI-60                         | 60      |
| STANFORD_1971_SPRI-NSF-TUD_AIR_BM3       | Antarctic-wide (SPRI-NSF-TUD surveys) | Stanford University                          | <a href="https://doi.org/10.1073/pnas.1821646116">https://doi.org/10.1073/pnas.1821646116</a> | <a href="https://doi.org/10.25740/ykq4-9345">https://doi.org/10.25740/ykq4-9345</a>                     | -9999 | -9999                                | 168.5 | SPRI/NSF/TU D radar            | 60; 300 |
| ULB_2012_BEWISE_GRN_BM3                  | Dronning Maud Land ice rises (BeWise) | Université Libre de Bruxelles                | <a href="https://doi.org/10.1017/iog.2016.7">https://doi.org/10.1017/iog.2016.7</a>           | <a href="https://doi.pangea.de/10.1594/PANGAEA.905997">https://doi.pangea.de/10.1594/PANGAEA.905997</a> | 6.5   | Incoherent                           | 168   | NPI radar                      | 10      |
| ULB_2012_ICECON_GRN_BM3                  | Dronning Maud Land ice rises (IceCon) | Université Libre de Bruxelles                | <a href="https://doi.org/10.1002/2014JF003246">https://doi.org/10.1002/2014JF003246</a>       | <a href="https://doi.org/10.1594/PANGAEA.905315">https://doi.org/10.1594/PANGAEA.905315</a>             | 8.8   | Incoherent                           | 168   | NPI radar                      | 2       |
| UTIG_2009_Darwin-Hatherton_AIR_BM3       | David and Hatherton glacier system    | University of Texas Institute for Geophysics | <a href="http://doi.org/10.1017/iog.2017.60">http://doi.org/10.1017/iog.2017.60</a>           | <a href="https://doi.org/10.15784/601605">https://doi.org/10.15784/601605</a>                           | 0     | pik1 (short coherent)                | 168.4 | HiCARS                         | 60      |
| UTIG_2010_ICECAP_AIR_BM3                 | Antarctic-wide (ICECAP)               | University of Texas Institute for Geophysics | <a href="https://doi.org/10.1038/nature10114">https://doi.org/10.1038/nature10114</a>         | <a href="https://doi.org/10.5067/W2KXX0MYNJ9G">https://doi.org/10.5067/W2KXX0MYNJ9G</a>                 | 0     | pik1 (short coherent)                | 168.4 | HiCARS                         | 60      |
| UTIG_2013_GIMBLE_AIR_BM3                 | Marie Byrd Land (GIMBLE)              | University of Texas Institute for Geophysics | <a href="https://doi.org/10.1038/ngeo1992">https://doi.org/10.1038/ngeo1992</a>               | <a href="https://doi.org/10.15784/601001">https://doi.org/10.15784/601001</a>                           | 0     | 2-D Synthetic Aperture Radar focused | 168.4 | HiCARS                         | 60      |
| UTIG_2015_EAGLE_AIR_BM3                  | East Antarctic coastline (EAGLE)      | University of Texas Institute for Geophysics | <a href="https://doi.org/10.1098/rsta.2014.0297">https://doi.org/10.1098/rsta.2014.0297</a>   | <a href="https://doi.org/10.26179/5bcfffdabcf92">https://doi.org/10.26179/5bcfffdabcf92</a>             | 0     | pik1 (short coherent)                | 168.4 | MARFA                          | 60      |
| UTIG_2016_OLDICE_AIR_BM3                 | Dome C                                | University of Texas Institute for Geophysics | <a href="https://doi.org/10.1098/rsta.2014.0297">https://doi.org/10.1098/rsta.2014.0297</a>   | <a href="https://doi.org/10.15784/601355">https://doi.org/10.15784/601355</a>                           | 0     | 2-D Synthetic Aperture Radar focused | 168.4 | MARFA                          | 60      |
| UWASHINGTON_2018_South-Pole-Lake_GRN_BM3 | South Pole                            | University of Washington                     | <a href="https://doi.org/10.1017/aog.2020.32">https://doi.org/10.1017/aog.2020.32</a>         | <a href="https://hdl.handle.net/1773/45293">https://hdl.handle.net/1773/45293</a>                       | -9999 | 2-D migration                        | 169   | University of Washington radar | 3       |
