# Supplementary material for: Antarctic Bedmap data: Findable, Accessible, Interoperable, and Reusable (FAIR) sharing of 60 years of ice bed, surface, and thickness data
Source: Copernicus journal article supplement (doi:10.5194/essd-15-2695-2023), 2023-07-17
Supplement: Supplementary file 2 [file essd-15-2695-2023-supplement.zip]

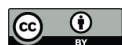

## *Supplement of*

# **Antarctic Bedmap data: Findable, Accessible, Interoperable, and Reusable (FAIR) sharing of 60 years of ice bed, surface, and thickness data**

**Alice C. Frémand et al.**

*Correspondence to:* Alice C. Frémand (almand@bas.ac.uk) and Peter Fretwell (ptf@bas.ac.uk)

- [essd-15-2695-2023-supplement-title-page.pdf](#)
- [Bedmap\\_supp](#)
  - [S1\\_S2\\_tables.pdf](#)
  - [S1\\_table.csv](#)
  - [S2\\_table.csv](#)

The copyright of individual parts of the supplement might differ from the article licence.
